# Supplementary material
Source: HighWire-hosted journal article supplement (doi:10.1101/rna.078493.120)
Supplement: Supplemental_Figures_.docx [file Supplemental_Figures_.docx]

**Figure S1. Ratio of green channel TO1-B signal to red channel TO3-B signals for round 12 and round 15 aptamers.** Clones from rounds 12 and 15 of the TO3-B selection were incubated with TO1-B (100 nM) and TO3-B (200 nM) in WB buffer. Logs of the resulting ratios were compared between clones within **(A)** Round 12 and **(B)** Round 15 with Mango III A10U as a control.

**Figure S2. *K*D measurements for RNA aptamer:fluorophore complexes.** Binding affinity curves were done in WB buffer for **(A)** Peach I, **(B)** Peach II, and **(C)** Mango III A10U for TO1-B (green curve), YO3-B (orange curve), TO3-B (red curve) using 10 nM of each fluorophore. Error bars represent the standard deviation for an experiment performed in triplicate.

| Parameter | |
| --- | --- |
| *K*D(TO3-B) nM | 18.3 ± 0.3 |
| Fmax | 104 ± 1.08 |
| Unbound TO3-B Slope | 0.14 ± 0.001 |


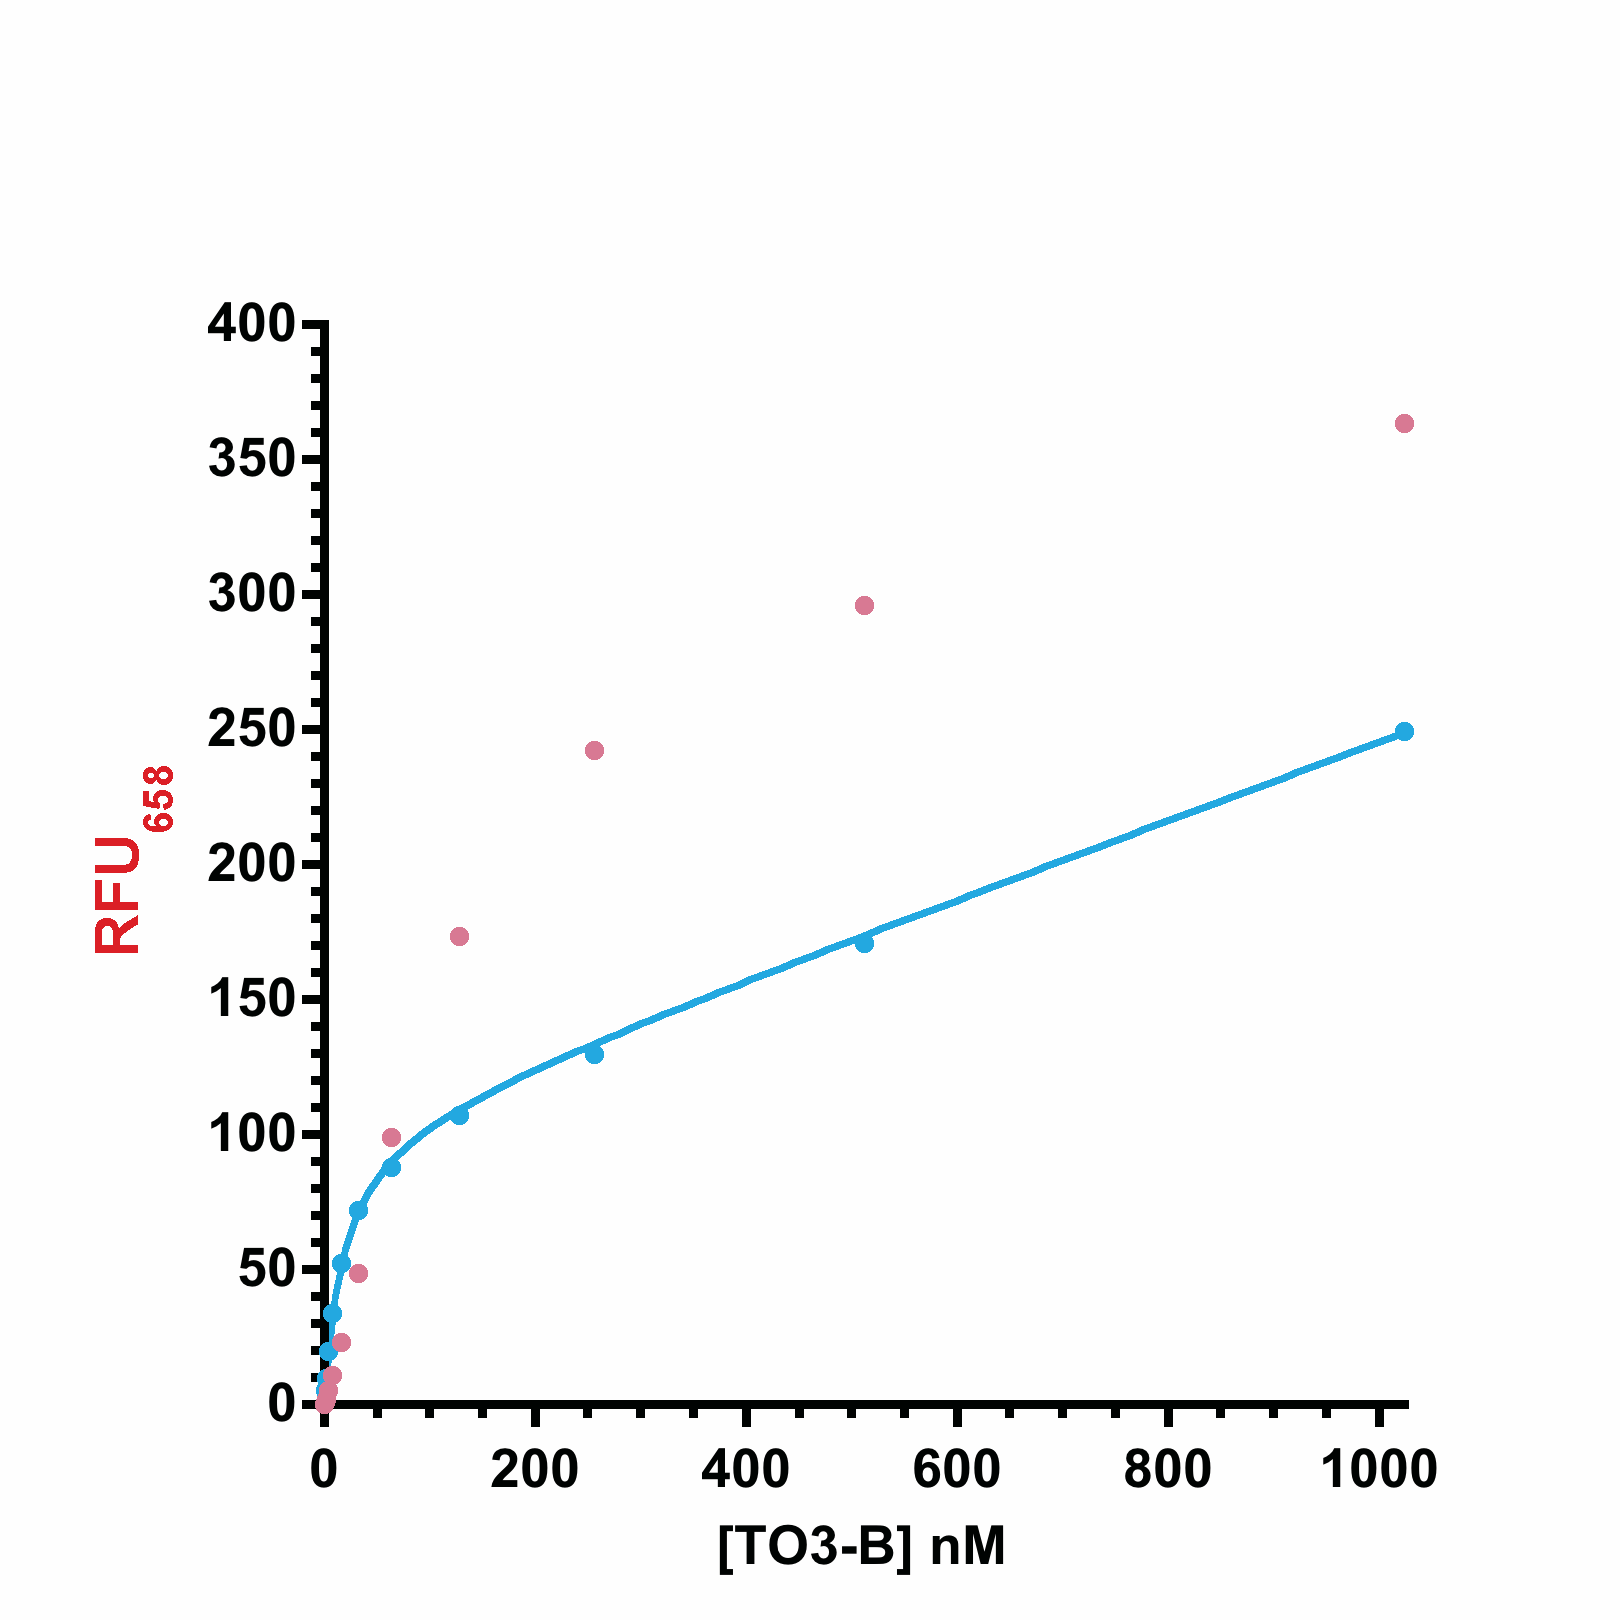


**Figure S3. TO3-B** **Titration with Peach I (blue) or Peach II (pink).** Measurements were done in WB buffer using 10 nM of each aptamer. The Peach I curve was fitted to a 2 parameter fit (eq. 2) with an addition of a linear portion to account for increasing unbound TO3-B signal with values shown in the table.

**Figure S4. Salt titrations with Li+ (blue), Na+ (purple), or K+ (pink) for either (A) Peach I or (B) Peach II with TO3-B (top) and TO1-B (bottom).** Potassium data was fitted to the Hill equation with the Hill coefficients listed in Table B. However, grey diamond data points were not included.

**
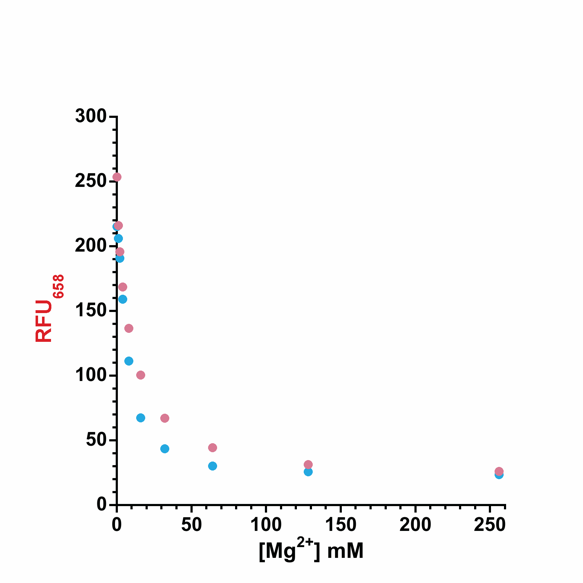
**

**Figure S5. Effect of increasing concentrations of MgCl2.** The red channel TO3-B (50 nM) signal of Peach I (blue) and Peach II (pink) (25 nM each) exponentially decreases with increasing Mg2+ concentrations.

**Figure S6. DMS Probing for (A) Peach I and (B) Peach II.** Lane 1 corresponds to the hydrolysis ladder, 2 to the T1 RNase ladder, 3 to (-), and 4 to DMS probing with denatured RNA. Lanes 5 and 6 are in the presence of K+ (140 mM) with and without TO3-B (1 µM), as well as both 7 and 8 in the presence of Li+ (140 mM) with and without TO3-B respectively. Lane 9 corresponds to incubation with K+ and TO1-B (1 µM).

**
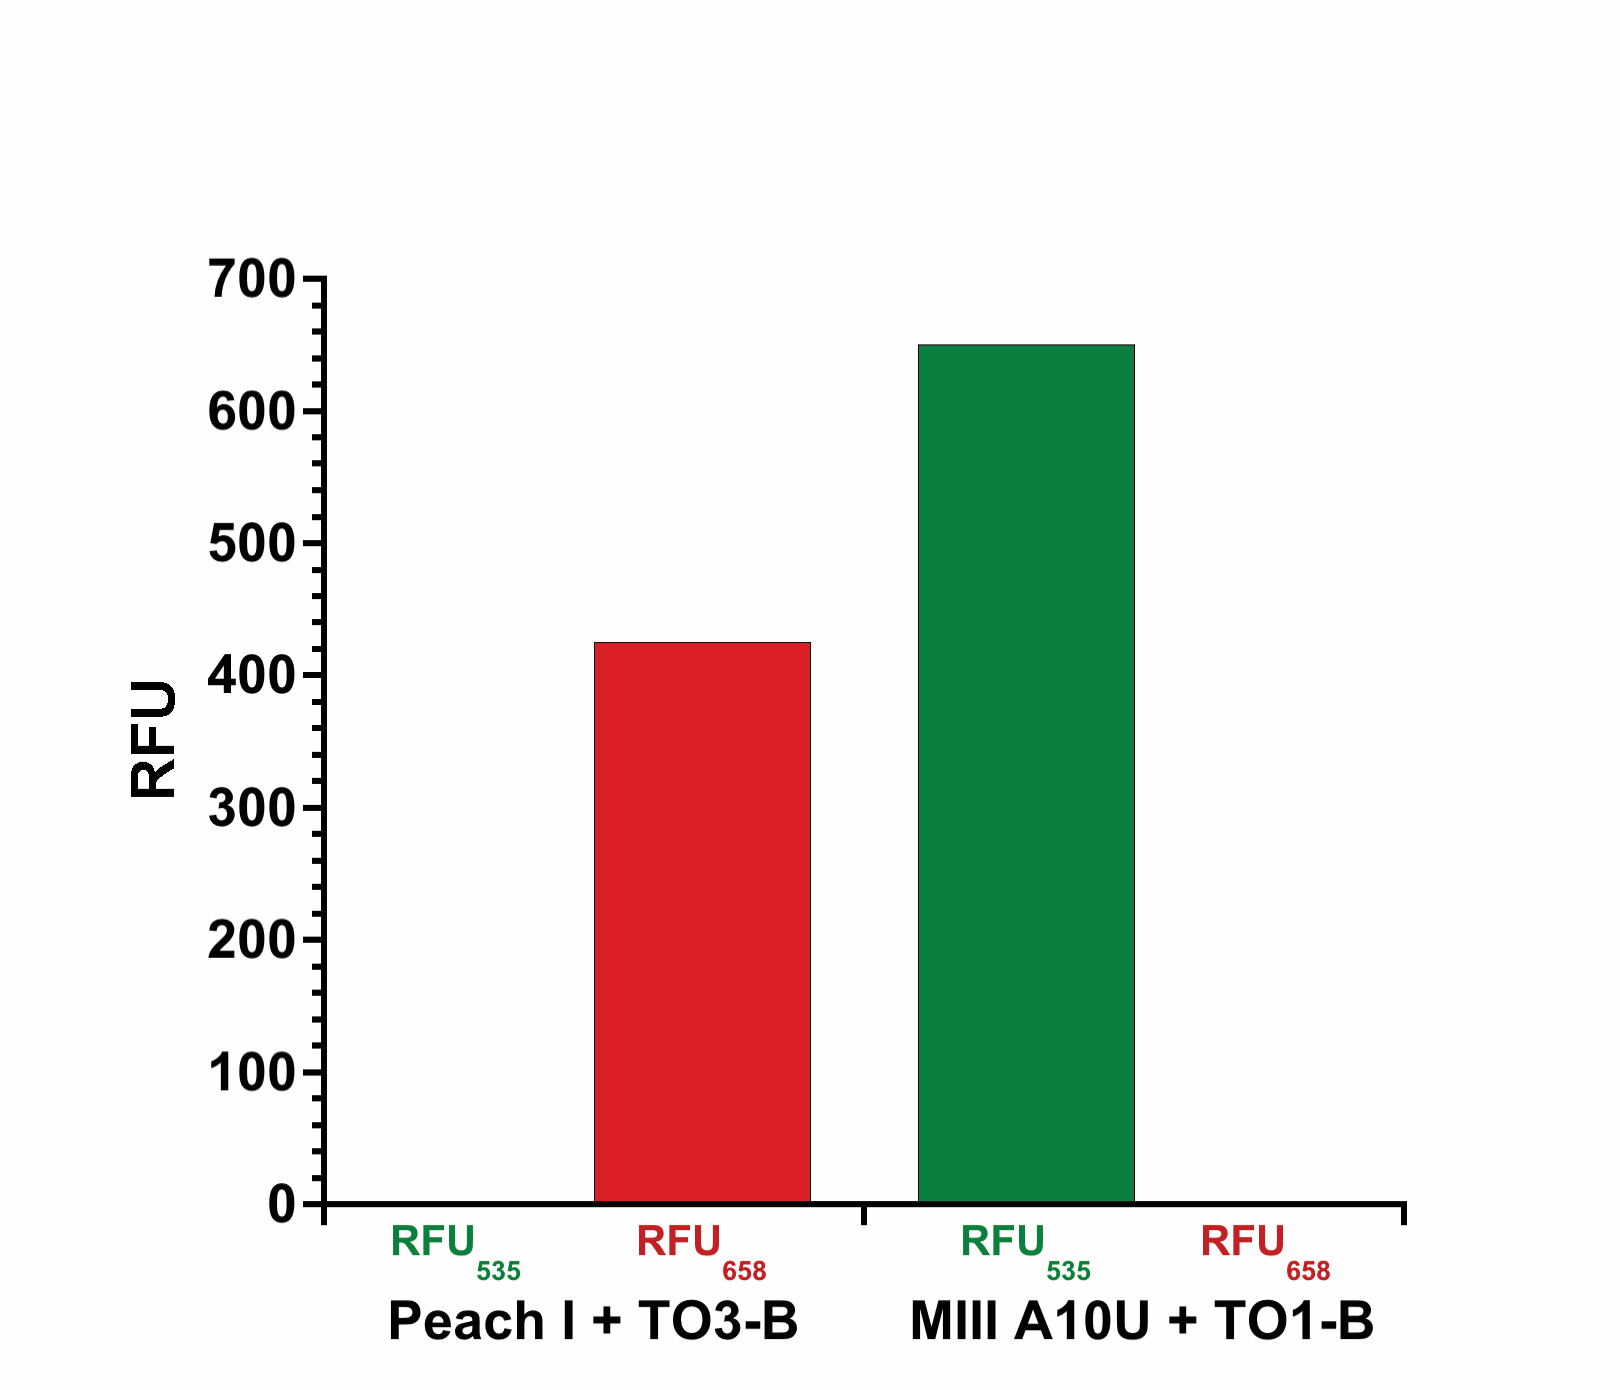
**

**Figure S7. Absence of bleed through between the red TO3-B channel and green TO1-B channel.** Peach I or MIII A10U (50 nM) were incubated with their respective fluorophore TO3-B or TO1-B (100 nM each) and simultaneously read in the green TO1-B channel (ex: 510 nm, em: 535 nm) and red TO3-B channel (ex: 637 nm, em: 658 nm). Readings were taken on a Varian Cary Eclipse spectrophotometer.

**Figure S8. Linear fits for (A) MIII A10U and (B) Peach I.** Linear fits were derived from fluorescent green or red signals from the three different RNA aptamer gradients (0 to 50 nM) including simultaneously increasing and decreasing Peach I and MIII A10U (square), both increasing aptamers (circle), and solo aptamer gradients (diamond). Error bars represent SD from readings taken in triplicate in figure 6 of the main text.

**Figure S9. Extinction coefficients between unbound and bound TO3-B/YO3-B are the same between the two states.** Linear fits for **(AB)** YO3-B or **(CD)** TO3-B either **(AC)** bound to Peach I (4 µM) or **(BD)** unbound were performed on absorbance normalized samples in WB buffer.

**Table S1: Conditions of *in vitro* selection for TO3-B aptamers**

| Round | RNA Binding (min) | Wash 1 (min) | Wash 2 (min) | Competitors Used | [Competitor] µM | Pre-incubation (min) |
| --- | --- | --- | --- | --- | --- | --- |
| 3 | 30 | 5 | 15 | TO1-Acetate | 2.5 | 0 |
| TO3-Acetate |
| NMM |
| 4-5 | 30 | 5 | 30 | TO1-Acetate | 5 | 0 |
| TO3-Acetate |
| NMM |
| 6 | 30 | 60 | 60 | TO3-Acetate | 5 | 5 |
| NMM |
| TO1-Propylamine |
| 7 | 15 | 60 | 60 | TO3-Acetate | 5 | 30 |
| NMM |
| TO1-Propylamine |
| 8 | 4 | 60 | 60 | TO3-Acetate | 20 | 60 |
| NMM |
| TO1-Propylamine |
| 9 | 1 | 60 | 60 | TO3-Acetate | 20 | 60 |
| NMM |
| TO1-Propylamine |
| 10 | 0.5 | 60 | 60 | TO1-Propylamine | 20 | 60 |
| 11-16 | 0.5 | 60 | 60 | TO1-Propylamine | 20 | 60 |
| TO1-Methoxyethlyamine |
